# Supplementary material
Source: publisher figshare collection journal article supplement (https://gsajournals.figshare.com/articles/dataset/_/7311797)
Supplement: Supplementary file 1 [file 1]

## SUPPLEMENTARY MATERIALS

Santantonio, N., Jannink, J., Sorrells, M. 2018. A low resolution epistasis mapping approach to identify chromosome arm interactions in allohexaploid wheat. G3.

**Table S1** Table of centromere positions for the 21 chromosomes of hexaploid wheat based on the RefSeq v1.0 of ‘Chinese Spring’ (IWGSC 2018). These positions were provided by the IWGSC (IWGSC, personal communication, March 1, 2017).

| Chromosome      | Length <sup>a</sup> | Start <sup>b</sup> | End <sup>c</sup> | Single gap (T/F) <sup>d</sup> |
|-----------------|---------------------|--------------------|------------------|-------------------------------|
| 1A              | 594,102,056         | 213,545,945        | 213,546,046      | T                             |
| 2A              | 780,798,557         | 340,034,816        | 340,034,917      | T                             |
| 3A              | 750,843,639         | 319,010,276        | 319,010,377      | T                             |
| 4A              | 744,588,157         | 265,465,435        | 343,405,303      | F                             |
| 5A              | 709,773,743         | 253,779,933        | 253,780,034      | T                             |
| 6A              | 618,079,260         | 285,321,675        | 285,321,776      | T                             |
| 7A              | 736,706,236         | 359,432,051        | 359,432,152      | T                             |
| 1B              | 689,851,870         | 236,742,047        | 236,742,148      | T                             |
| 2B              | 801,256,715         | 349,410,174        | 349,410,275      | T                             |
| 3B <sup>e</sup> | 830,829,764         | 344,402,169        | 345,017,442      | F                             |
| 4B              | 673,617,499         | 319,324,823        | 319,324,924      | T                             |
| 5B              | 713,149,757         | 198,851,987        | 218,709,746      | F                             |
| 6B              | 720,988,478         | 325,245,204        | 325,245,305      | T                             |
| 7B              | 750,620,385         | 296,411,983        | 296,412,084      | T                             |
| 1D              | 495,453,186         | 172,519,511        | 172,519,612      | T                             |
| 2D              | 651,852,609         | 268,023,149        | 268,023,250      | T                             |
| 3D              | 615,552,423         | 242,690,774        | 242,690,875      | T                             |
| 4D              | 509,857,067         | 185,780,323        | 185,780,424      | T                             |
| 5D              | 566,080,677         | 188,798,562        | 188,798,663      | T                             |
| 6D              | 473,592,718         | 214,085,311        | 214,085,412      | T                             |
| 7D              | 638,686,055         | 339,371,184        | 339,371,285      | T                             |

<sup>a</sup> Total chromosome length

<sup>b</sup> Centromere start address

<sup>c</sup> Centromere end address

<sup>d</sup> Single gap is a boolean indicator referring to whether a clear position was determined for the centromere of each chromosome as indicated by the IWGSC (personal communication, March 1, 2017). The number of markers, *m*, used to estimate the density is shown for each chromosome.

<sup>e</sup> The chromosome 3B centromere position was estimated using a kernel density estimate of GBS marker positions on 3B.

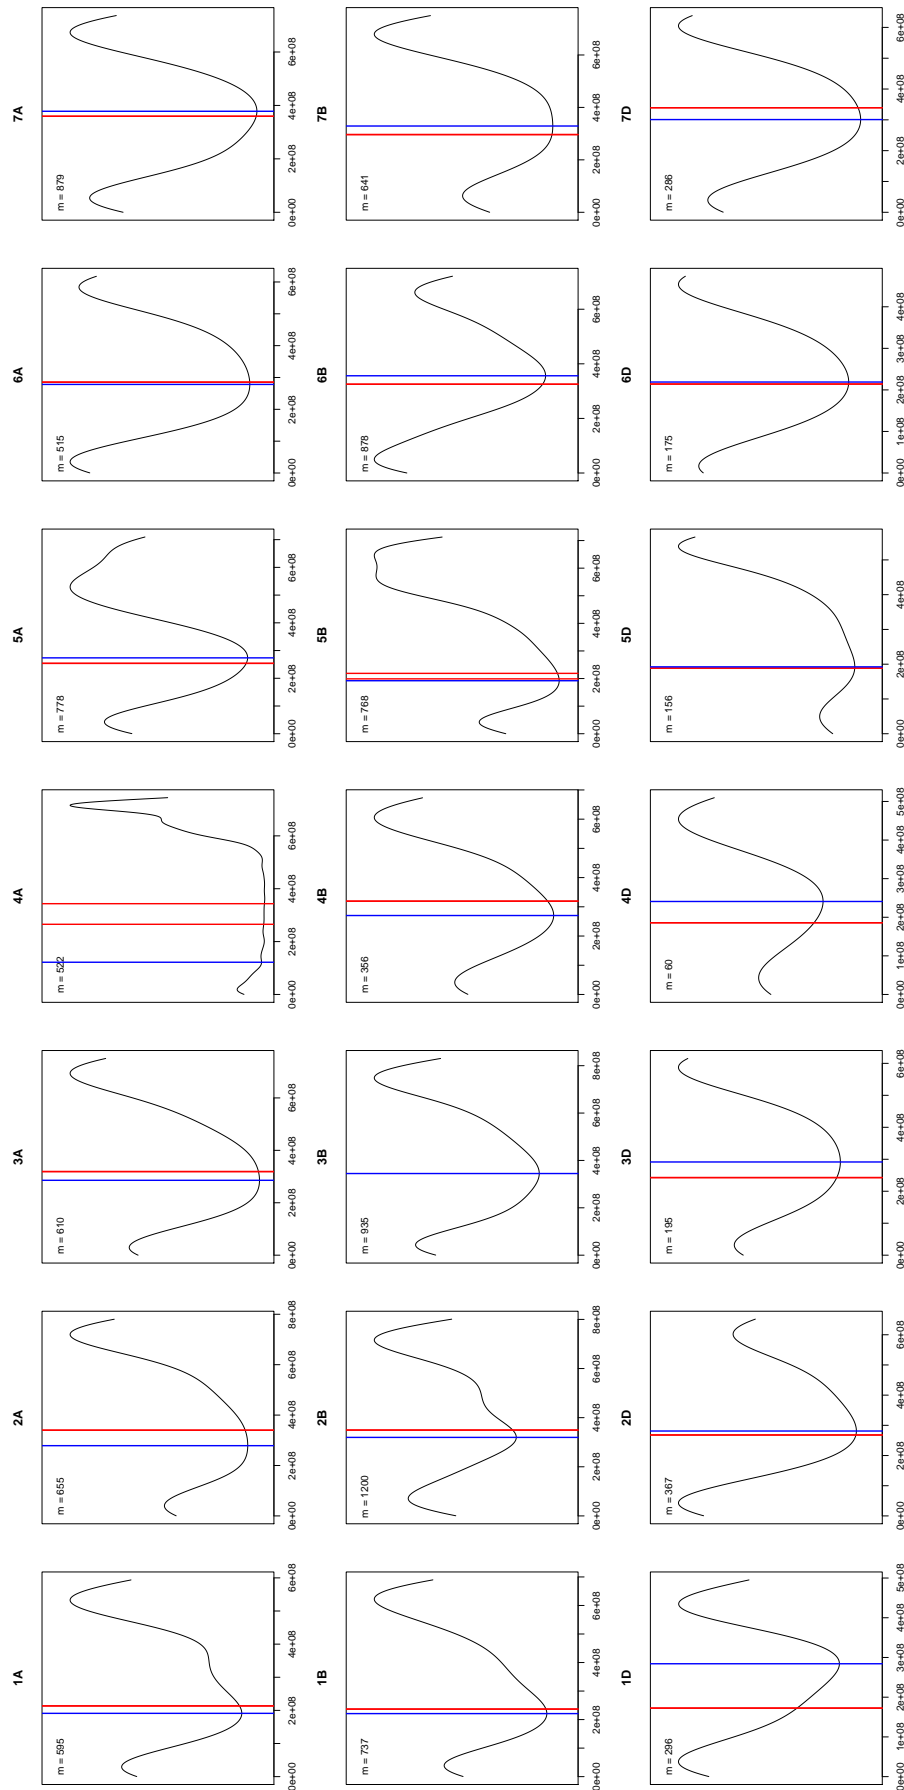

**Figure S1** Kernel density estimation of GBS marker distribution across the 21 chromosomes of wheat. Red lines indicate the centromere interval provided by IWGSC (per-sonal communication, March 1, 2017), and blue line indicate the centromere interval estimate based on the first derivative of the density estimate. No interval was provided by the IWGSC for chromosome 3B

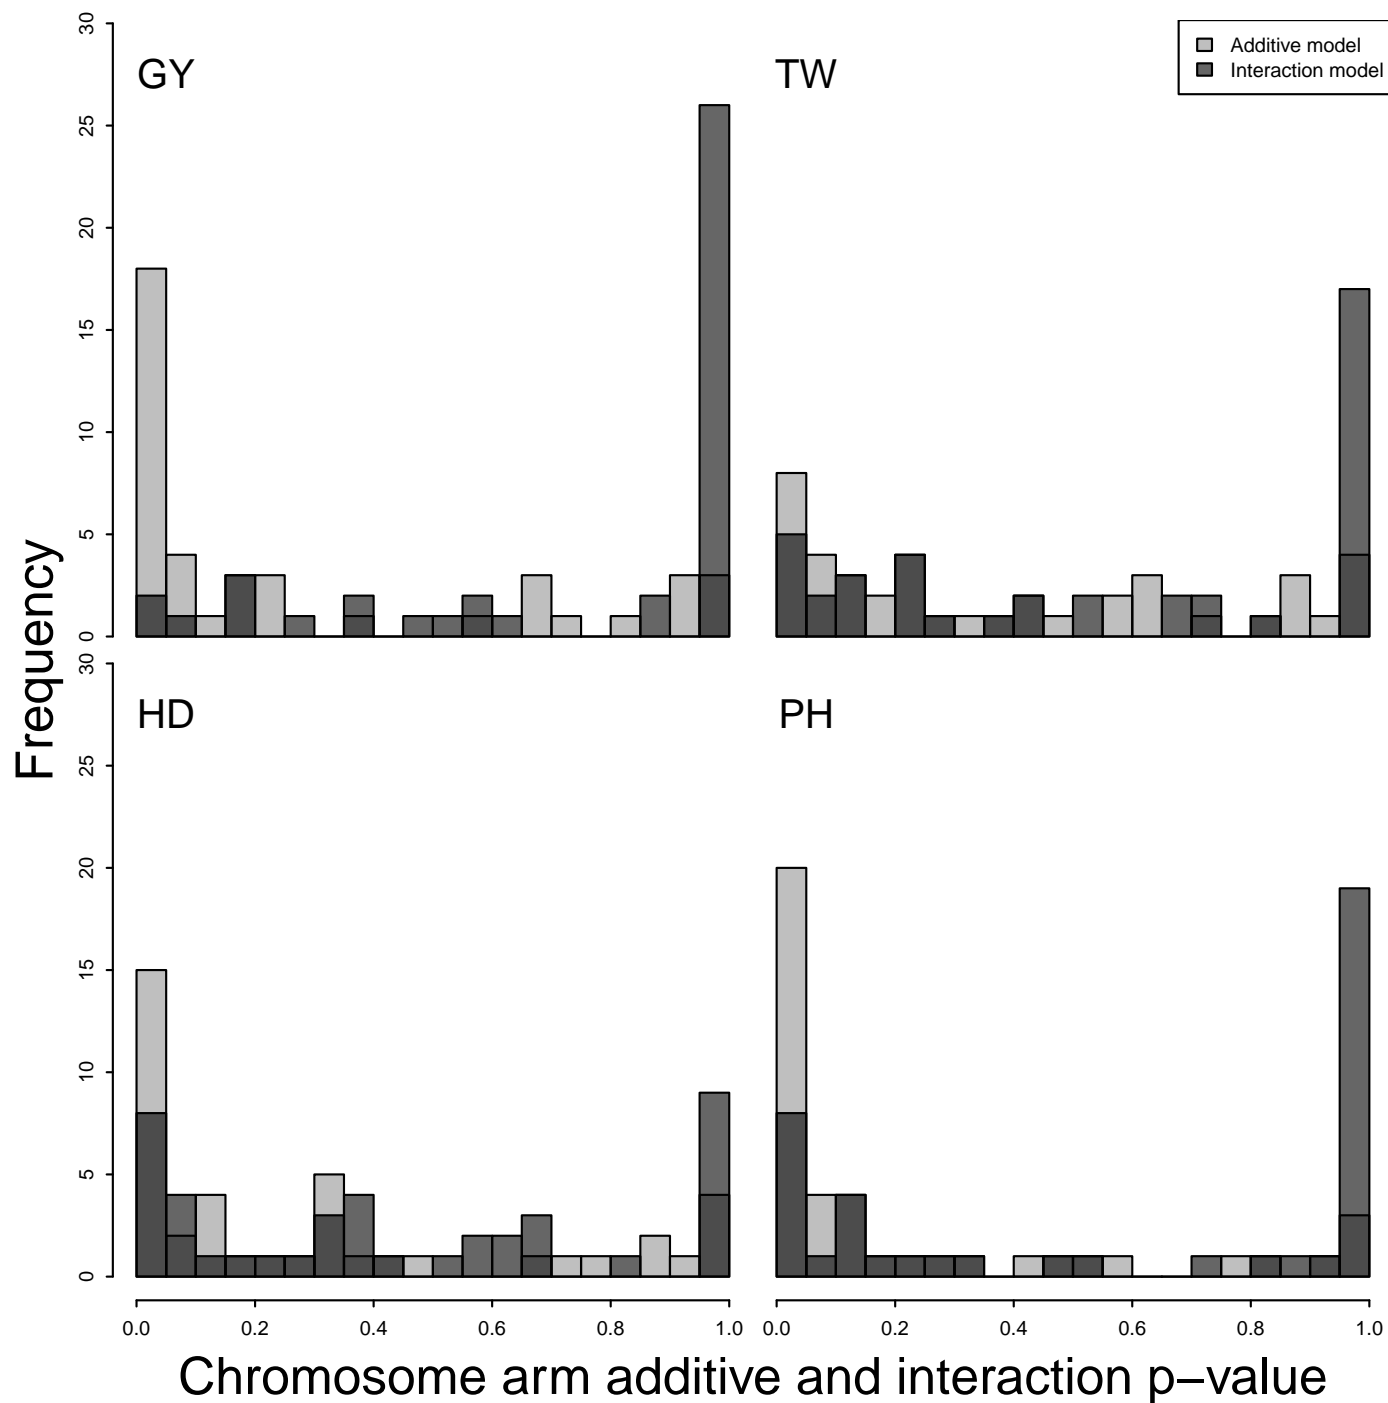

**Figure S2** Distribution of p-values for 42 homeologous chromosome arm pair models for four traits, GY, TW, PH and HD. The p-value from the likelihood ratio test for the additive chromosome arm model is plotted in light gray, whereas the p-value from the interaction model test is shown in dark gray.

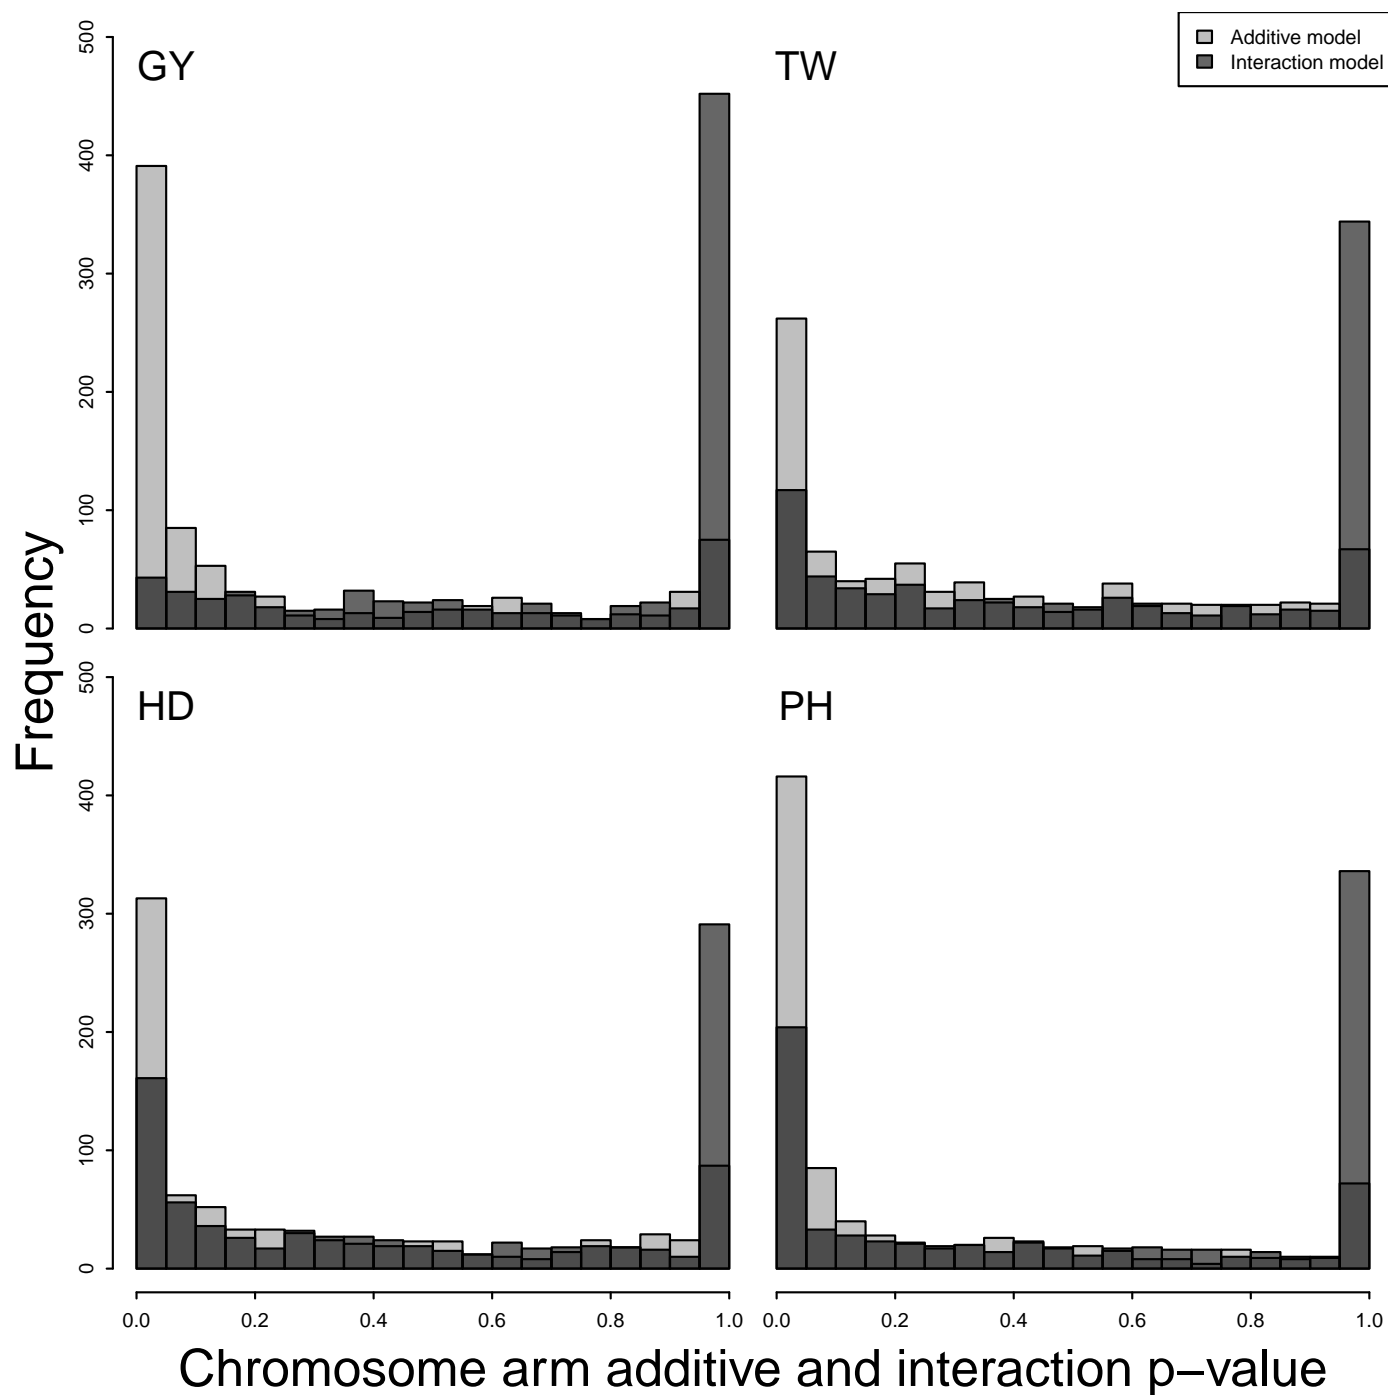

**Figure S3** Distribution of p-values for all 861 possible chromosome arm pair models for four traits, GY, TW, PH and HD. The p-value from the likelihood ratio test for the additive chromosome arm model is plotted in light gray, whereas the p-value from the the interaction model test is shown in dark gray.

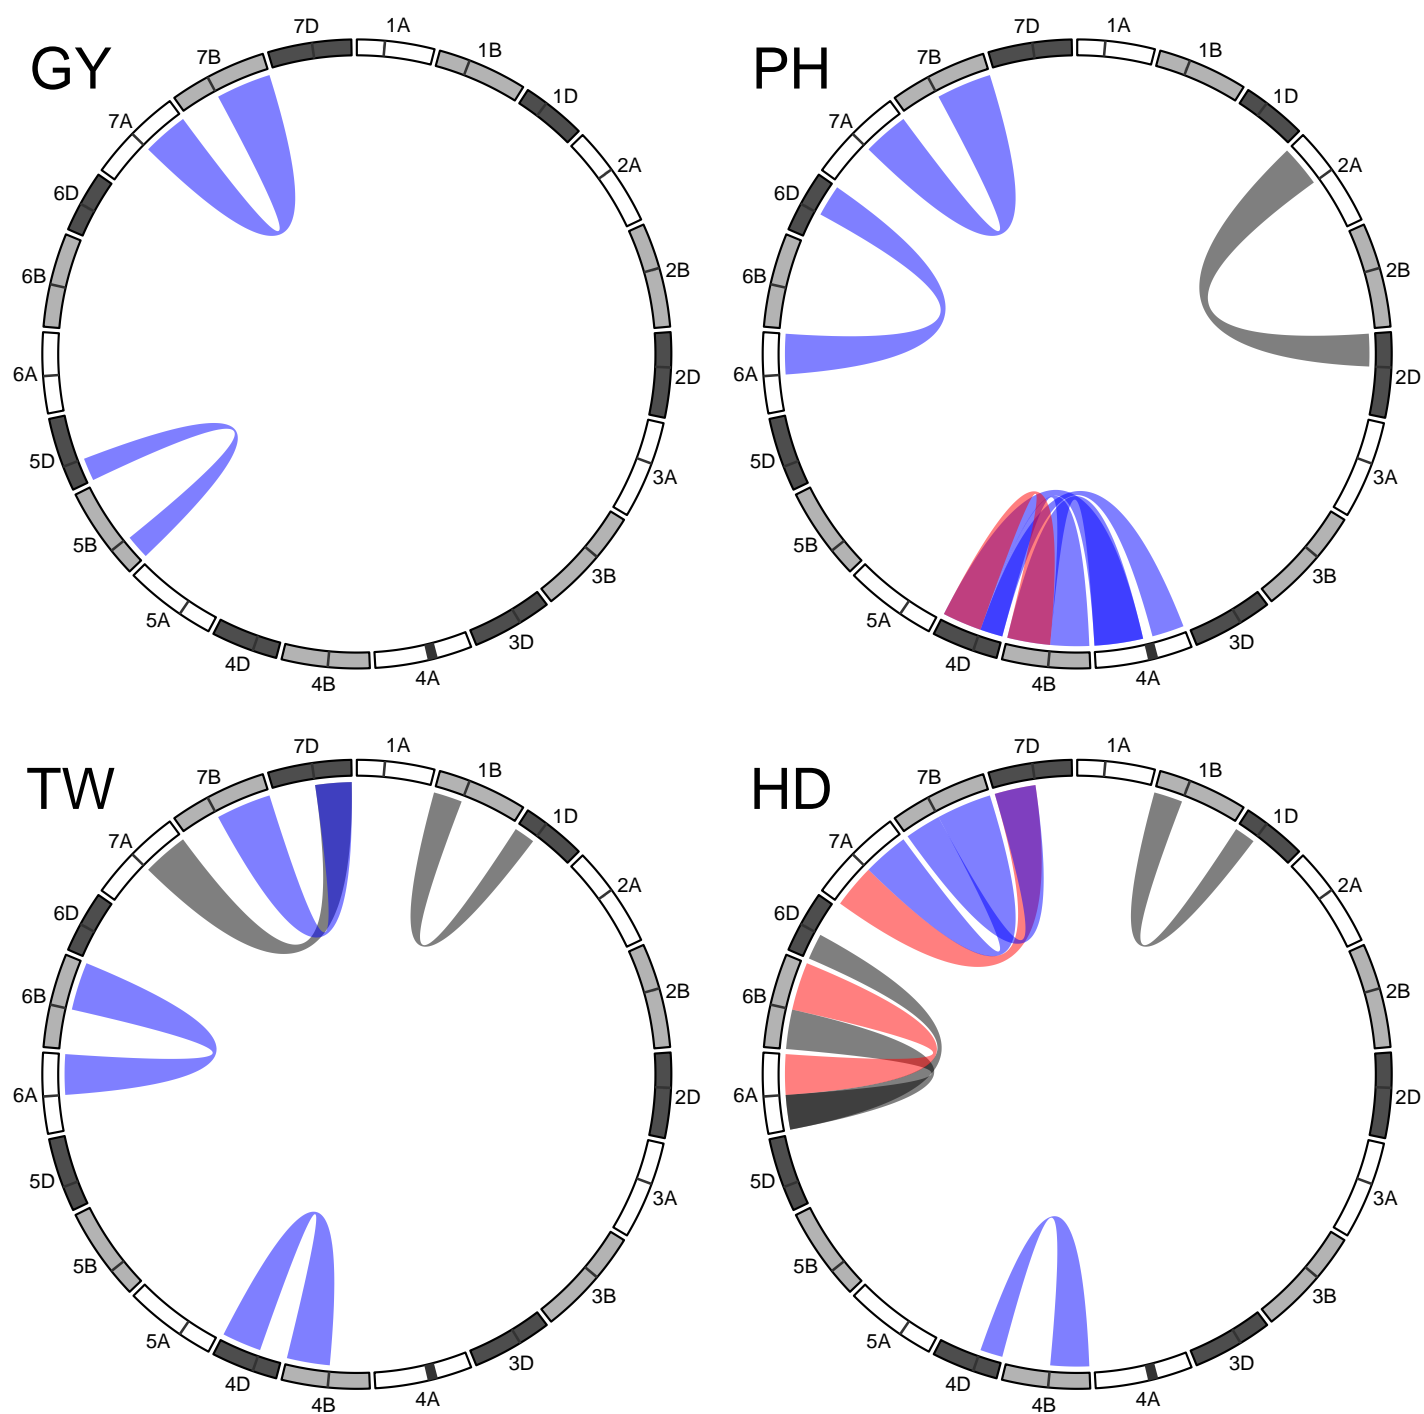

**Figure S4** Homeologous chromosome arm interactions significant at  $p < 0.05$ . Blue and red bridges indicate interactions with a significant positive or negative correlation between the product of the additive effects and their interaction effect, respectively. Black bridges indicate significant interactions that did not have a significant correlation between additive products and the interaction effect.

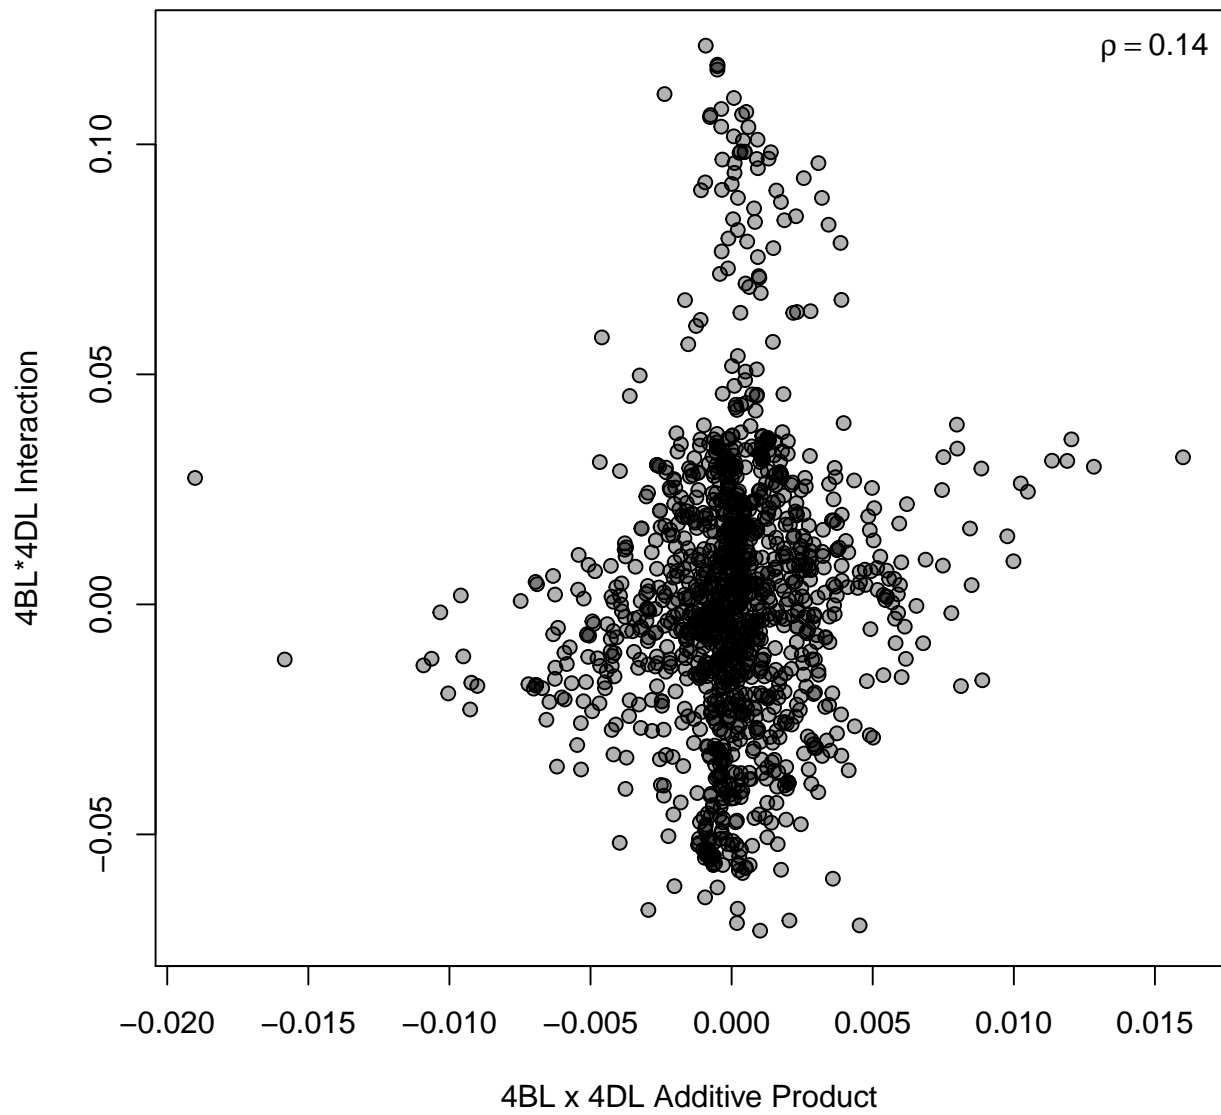

**Figure S5** Interaction effect of chromosome 4BL by 4DL plotted against the product of the additive effects for 4BL and 4DL for TW.  $\rho$  indicates the Pearson correlation coefficient.

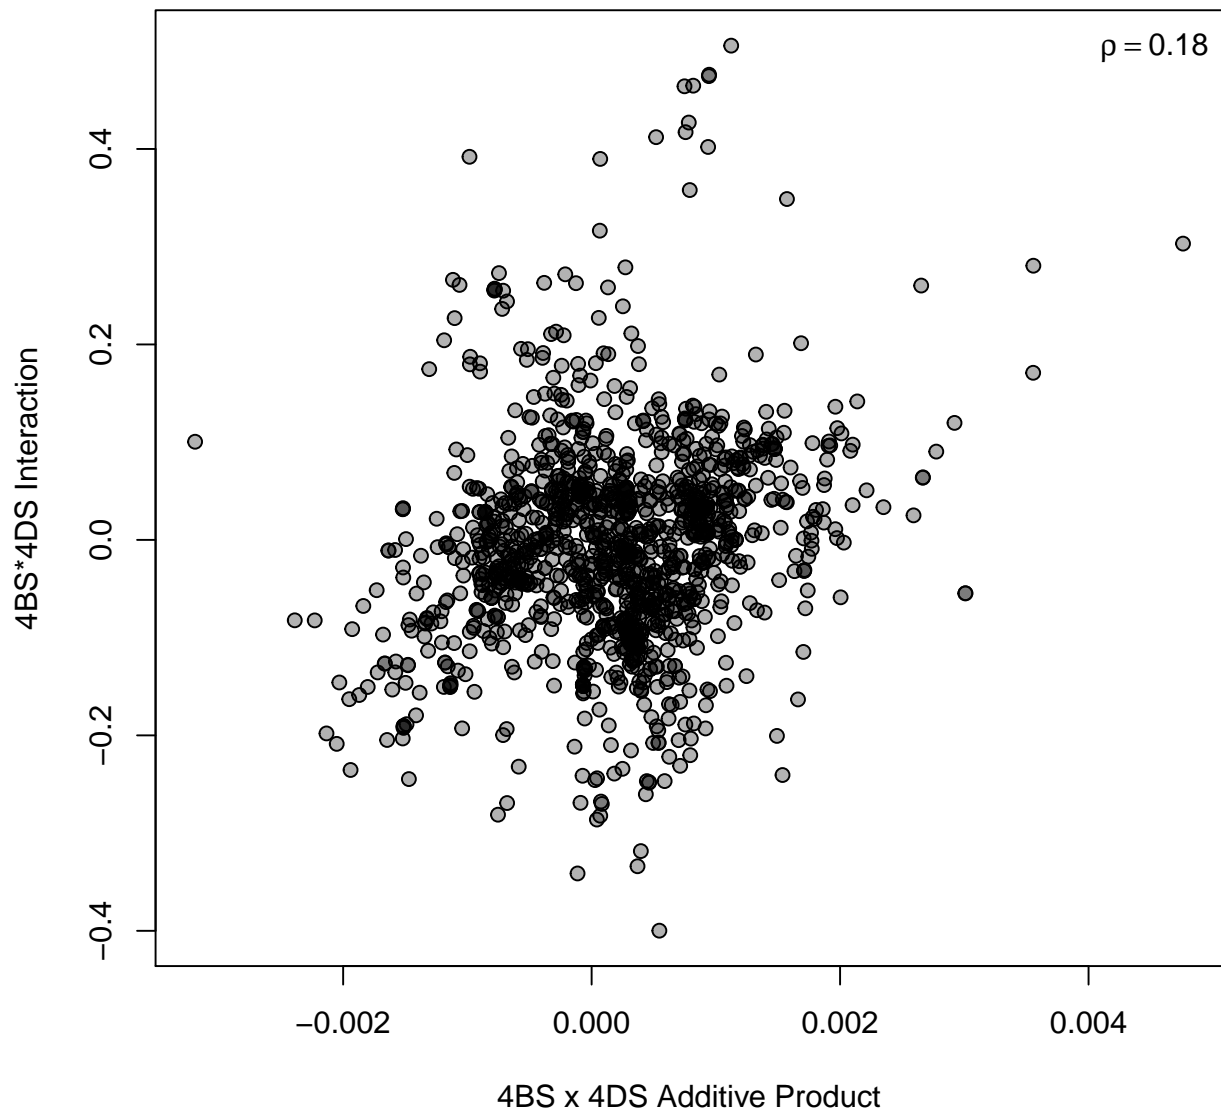

**Figure S6** Interaction effect of chromosome 4BS by 4DS plotted against the product of the additive effects for 4BS and 4DS for PH.  $\rho$  indicates the Pearson correlation coefficient.

■ **Table S2** Table of chromosome arm interactions for all four traits with interaction terms significant at a Bonferroni correction threshold of  $0.05/861 = 5.8 \times 10^{-5}$ . The proportion of genetic variance attributed to each arm and their corresponding interaction are shown with statistical significance from a nested likelihood ratio test.

| Trait | arm <sub>i</sub> | arm <sub>j</sub> | $(h^2_{\text{arm}_i}, h^2_{\text{arm}_j})^a$ | $h^2_{\text{arm}_i \times \text{arm}_j}$ | $\rho^b$ |
|-------|------------------|------------------|----------------------------------------------|------------------------------------------|----------|
| PH    | 1AL              | 2AL              | (0.039, 0.06)**** <sup>c</sup>               | 0.09****                                 | 0.37***  |
| PH    | 1AL              | 3AS              | (0.065, 0.011)**                             | 0.076****                                | −0.01    |
| PH    | 1AL              | 7AL              | (0.063, 0.000)*                              | 0.067****                                | 0.35***  |
| PH    | 1AL              | 4BS              | (0.042, 0.024)**                             | 0.073****                                | 0.08**   |
| PH    | 1AL              | 4BL              | (0.066, 0.012)***                            | 0.086****                                | −0.05    |
| PH    | 1AL              | 7BL              | (0.091, 0.043)***                            | 0.059****                                | 0.01     |
| PH    | 1AL              | 2DS              | (0.079, 0.094)****                           | 0.065****                                | 0.18***  |
| PH    | 1AL              | 4DS              | (0.048, 0.037)****                           | 0.064****                                | −0.04    |
| PH    | 1AL              | 4DL              | (0.070, 0.002)**                             | 0.048****                                | 0.05     |
| PH    | 2AL              | 7AL              | (0.040, 0.000)**                             | 0.056****                                | 0.27***  |
| PH    | 2AL              | 4BS              | (0.060, 0.032)***                            | 0.090****                                | −0.17*** |
| PH    | 2AL              | 2DS              | (0.036, 0.097)****                           | 0.061****                                | −0.17*** |
| PH    | 2AL              | 4DL              | (0.039, 0.000)***                            | 0.069****                                | 0.23***  |
| PH    | 3AS              | 6AS              | (0.015, 0.069)**                             | 0.084****                                | −0.22*** |
| PH    | 3AS              | 6AL              | (0.000, 0.086)**                             | 0.070****                                | 0.35***  |
| PH    | 3AS              | 7AL              | (0.008, 0.000)                               | 0.060****                                | 0.27***  |
| PH    | 3AS              | 7BL              | (0.001, 0.038)*                              | 0.068****                                | 0.01     |
| PH    | 3AS              | 4DS              | (0.020, 0.033)****                           | 0.057****                                | −0.09**  |
| PH    | 3AL              | 2DS              | (0.004, 0.068)**                             | 0.042****                                | −0.11*** |
| PH    | 3AL              | 4DS              | (0.008, 0.033)****                           | 0.050****                                | −0.17*** |
| PH    | 3AL              | 4DL              | (0.002, 0.010)                               | 0.023****                                | −0.07**  |
| PH    | 6AS              | 7AL              | (0.083, 0.000)**                             | 0.069****                                | 0.4***   |
| PH    | 6AS              | 1BS              | (0.078, 0.011)***                            | 0.100****                                | 0.02     |
| PH    | 6AS              | 4BS              | (0.054, 0.000)***                            | 0.130****                                | −0.01    |
| PH    | 6AS              | 4DS              | (0.160, 0.042)****                           | 0.052****                                | 0.03     |
| PH    | 6AS              | 4DL              | (0.087, 0.000)**                             | 0.073****                                | 0.23***  |
| PH    | 6AS              | 6DL              | (0.069, 0.0077)**                            | 0.084****                                | 0.09**   |
| PH    | 7AL              | 4BL              | (0.000, 0.029)*                              | 0.058****                                | 0.29***  |
| PH    | 7AL              | 2DS              | (0.001, 0.064)**                             | 0.054****                                | 0.11***  |
| PH    | 7AL              | 6DL              | (0.000, 0.016)                               | 0.051****                                | 0.31***  |
| PH    | 1BS              | 2DS              | (0.000, 0.110)***                            | 0.062****                                | 0.22***  |
| PH    | 1BS              | 4DS              | (0.000, 0.035)****                           | 0.042****                                | 0.26***  |
| PH    | 1BS              | 4DL              | (0.023, 0.009)                               | 0.041****                                | 0.30***  |
| PH    | 2BS              | 4BS              | (0.027, 0.053)*                              | 0.084****                                | −0.11*** |
| PH    | 2BS              | 4DS              | (0.038, 0.032)**** <sup>d</sup>              | 0.069****                                | −0.12*** |
| PH    | 2BL              | 4DS              | (0.200, 0.029)****                           | 0.052****                                | 0.13***  |
| PH    | 4BS              | 4DS              | (0.002, 0.031)****                           | 0.049****                                | 0.18***  |
| PH    | 4BS              | 4DL              | (0.000, 0.000)                               | 0.056****                                | 0.00     |

<sup>a</sup>  $h^2$  represents the proportion of the chromosome arm additive or interaction variance component estimates to the total genetic variance.

<sup>b</sup>  $\rho$  indicates the correlation between the product of the additive arm effects and their interaction effect with correlation coefficients significantly different from zero indicated by asterisks. If only one additive effect had a non-zero variance, the correlation coefficient shown is the correlation between the additive effect with the non-zero variance and the interaction effect.

<sup>c</sup> \*, \*\*, \*\*\*, and \*\*\*\* correspond to p-values < 0.05, 0.01, 0.001, and a Bonferroni correction of  $0.05/861 = 5.8 \times 10^{-5}$ , respectively.



**Table S3** Continuation of Table S2 of significant chromosome arm interactions.

| Trait | arm <sub>i</sub> | arm <sub>i'</sub> | (h <sup>2</sup> <sub>arm<sub>i</sub></sub> , h <sup>2</sup> <sub>arm<sub>i'</sub></sub> ) <sup>a</sup> | h <sup>2</sup> <sub>arm<sub>i</sub> × arm<sub>i'</sub></sub> | ρ <sup>b</sup> |
|-------|------------------|-------------------|--------------------------------------------------------------------------------------------------------|--------------------------------------------------------------|----------------|
| PH    | 4BS              | 6DL               | (0, 0.021)                                                                                             | 0.11**** <sup>c</sup>                                        | 0.070**        |
| PH    | 4BL              | 4DS               | (0.063, 0.029)****                                                                                     | 0.051****                                                    | −0.52***       |
| PH    | 4BL              | 4DL               | (0.048, 0.003)*                                                                                        | 0.058****                                                    | −0.65***       |
| PH    | 7BL              | 2DS               | (0.030, 0.090)***                                                                                      | 0.071****                                                    | 0.00           |
| PH    | 7BL              | 4DL               | (0.031, 0.001)*                                                                                        | 0.094****                                                    | −0.12***       |
| PH    | 2DS              | 3DS               | (0.058, 0.047)****                                                                                     | 0.034****                                                    | 0.07**         |
| PH    | 2DS              | 4DS               | (0.130, 0.038)****                                                                                     | 0.046****                                                    | 0.07**         |
| PH    | 2DS              | 4DL               | (0.110, 0.006)***                                                                                      | 0.031****                                                    | 0.04           |
| PH    | 2DS              | 5DS               | (0.080, 0.003)**                                                                                       | 0.031****                                                    | 0.11***        |
| PH    | 4DS              | 6DL               | (0.031, 0.002)****                                                                                     | 0.036****                                                    | 0.08**         |
| PH    | 4DL              | 6DL               | (0.002, 0.011)                                                                                         | 0.026****                                                    | −0.38***       |
| TW    | 1AL              | 1BS               | (0.015, 0.000)                                                                                         | 0.130****                                                    | 0.23***        |
| TW    | 1AL              | 7DL               | (0.015, 0.061)                                                                                         | 0.097****                                                    | −0.13***       |
| TW    | 2AL              | 3BS               | (0.013, 0.000)                                                                                         | 0.130****                                                    | 0.19***        |
| TW    | 2AL              | 7DL               | (0.032, 0.063)                                                                                         | 0.110****                                                    | 0.00           |
| TW    | 3AL              | 7DL               | (0.019, 0.072)                                                                                         | 0.085****                                                    | 0.01           |
| TW    | 4AL              | 7DL               | (0.054, 0.053)*                                                                                        | 0.110****                                                    | −0.11***       |
| TW    | 5AL              | 1BS               | (0.031, 0.000)                                                                                         | 0.150****                                                    | 0.26***        |
| TW    | 5AL              | 7DL               | (0.026, 0.026)*                                                                                        | 0.140****                                                    | 0.06*          |
| TW    | 6AS              | 7DL               | (0.000, 0.058)                                                                                         | 0.110****                                                    | 0.04           |
| TW    | 7AS              | 7DL               | (0.007, 0.059)                                                                                         | 0.090****                                                    | 0.01           |
| TW    | 7AL              | 7DL               | (0.019, 0.030)                                                                                         | 0.140****                                                    | −0.04          |
| TW    | 1BS              | 7DL               | (0.000, 0.018)                                                                                         | 0.180****                                                    | 0.18***        |
| TW    | 2BL              | 7DL               | (0.004, 0.063)                                                                                         | 0.110****                                                    | −0.21***       |
| TW    | 3BS              | 7DL               | (0.000, 0.071)                                                                                         | 0.120****                                                    | 0.11***        |
| TW    | 3BL              | 7DL               | (0.003, 0.054)                                                                                         | 0.160****                                                    | 0.11***        |
| TW    | 6BS              | 7DL               | (0.000, 0.056)                                                                                         | 0.093****                                                    | 0.08**         |
| TW    | 7DS              | 7DL               | (0.000, 0.057)                                                                                         | 0.088****                                                    | −0.02          |
| HD    | 6AS              | 7AS               | (0.004, 0.008)                                                                                         | 0.098****                                                    | −0.03          |
| HD    | 6AS              | 1BS               | (0.007, 0.000)                                                                                         | 0.058****                                                    | 0.11***        |
| HD    | 6AS              | 3BS               | (0.012, 0.064)***                                                                                      | 0.082****                                                    | −0.12***       |
| HD    | 6AS              | 5BS               | (0.004, 0.000)                                                                                         | 0.051****                                                    | 0.11***        |
| HD    | 6AS              | 7BL               | (0.008, 0.033)***                                                                                      | 0.075****                                                    | 0.06*          |
| HD    | 7AS              | 7BL               | (0.009, 0.037)****                                                                                     | 0.073****                                                    | −0.05          |
| HD    | 7AS              | 1DS               | (0.013, 0.000)                                                                                         | 0.053****                                                    | −0.09**        |
| HD    | 1BS              | 4DS               | (0.000, 0.002)                                                                                         | 0.044****                                                    | 0.00           |
| HD    | 1BL              | 4DS               | (0.000, 0.004)                                                                                         | 0.035****                                                    | 0.02           |
| HD    | 7BL              | 3DS               | (0.036, 0.002)***                                                                                      | 0.061****                                                    | 0.03           |
| HD    | 7BL              | 4DS               | (0.031, 0.003)***                                                                                      | 0.053****                                                    | 0.05*          |
| HD    | 7BL              | 6DL               | (0.035, 0.010)***                                                                                      | 0.056****                                                    | −0.15***       |
| HD    | 3DS              | 4DS               | (0.000, 0.003)                                                                                         | 0.029****                                                    | 0.00           |

<sup>a</sup> h<sup>2</sup> represents the proportion of the chromosome arm additive or interaction variance component estimates to the total genetic variance.

<sup>b</sup> ρ indicates the correlation between the product of the additive arm effects and their interaction effect with correlation coefficients significantly different from zero indicated by asterisks. If only one additive effect had a non-zero variance, the correlation coefficient shown is the correlation between the additive effect with the non-zero variance and the interaction effect.

<sup>c</sup> \*, \*\*, and \*\*\*\* correspond to p-values < 0.05, 0.01, 0.001, and a Bonferroni correction of 0.05/861 = 5.8 × 10<sup>−5</sup>, respectively.

■ **Table S4** Counts of significant homeologous chromosome arm interactions by arm and traits.

| Chromosome Arm | GY | PH | TW | HD | Total |
|----------------|----|----|----|----|-------|
| 1AL            | 0  | 9  | 2  | 0  | 11    |
| 1BL            | 0  | 0  | 0  | 1  | 1     |
| 1BS            | 0  | 4  | 3  | 2  | 9     |
| 1DS            | 0  | 0  | 0  | 1  | 1     |
| 2AL            | 0  | 5  | 2  | 0  | 7     |
| 2BS            | 0  | 2  | 0  | 0  | 2     |
| 2BL            | 0  | 1  | 1  | 0  | 2     |
| 2DS            | 0  | 10 | 0  | 0  | 10    |
| 3AS            | 0  | 6  | 0  | 0  | 6     |
| 3AL            | 0  | 3  | 1  | 0  | 4     |
| 3BS            | 0  | 0  | 2  | 1  | 3     |
| 3BL            | 0  | 0  | 1  | 0  | 1     |
| 3DS            | 0  | 1  | 0  | 2  | 3     |
| 4AL            | 0  | 0  | 1  | 0  | 1     |
| 4BS            | 0  | 7  | 0  | 0  | 7     |
| 4BL            | 0  | 4  | 0  | 0  | 4     |
| 4DS            | 0  | 11 | 0  | 4  | 15    |
| 4DL            | 0  | 10 | 0  | 0  | 10    |
| 5AL            | 0  | 0  | 2  | 0  | 2     |
| 5BS            | 0  | 0  | 0  | 1  | 1     |
| 5DS            | 0  | 1  | 0  | 0  | 1     |
| 6AS            | 0  | 7  | 1  | 5  | 13    |
| 6AL            | 0  | 1  | 0  | 0  | 1     |
| 6BS            | 0  | 0  | 1  | 0  | 1     |
| 6DL            | 0  | 5  | 0  | 1  | 6     |
| 7AS            | 0  | 0  | 1  | 3  | 4     |
| 7AL            | 0  | 7  | 1  | 0  | 8     |
| 7BL            | 0  | 4  | 0  | 5  | 9     |
| 7DS            | 0  | 0  | 1  | 0  | 1     |
| 7DL            | 0  | 0  | 14 | 0  | 14    |
| Total          | 0  | 98 | 34 | 26 | 158   |
